# Supplementary material for: Multiple-structured nanocrystals towards bifunctional photoluminescent-superhydrophobic surfaces
Source: Royal Society of Chemistry journal article supplement (doi:10.1039/b926761a), 2010-01-01
Supplement: b926761a.pdf [file b926761a.pdf]

## ELECTRONIC SUPPORTING INFORMATION

### Multiple-Structured Nanocrystals Towards Bifunctional Photoluminescent-Superhydrophobic Surfaces

Linrui Hou, Caifeng Wang, Li Chen, and Su Chen\*

State Key Laboratory of Material-Oriented Chemical Engineering, College of Chemistry and  
Chemical Engineering, Nanjing University of Technology, Nanjing, 210009, P.R. China, Email:  
chensu@njut.edu.cn; Fax: +86-25-83172258

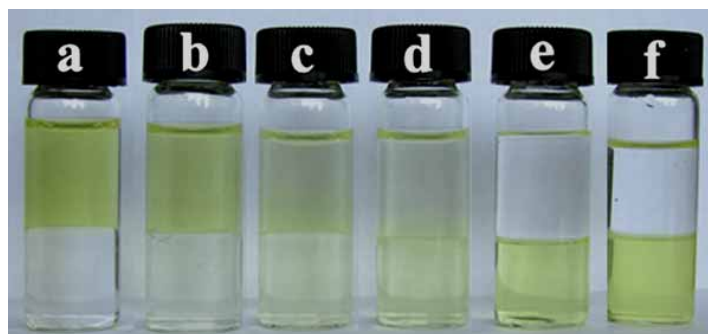

**Fig. S1.** Digital pictures of the interfacial reactions for CdS-D-DDAm as a function of reaction time (a) 0 d, (b) 1 d, (c) 5 d, (d) 15 d, (e) 25 d and (f) 30 d. The vessel containing two phase solution was sealed and maintained at room temperature for several days. The color of the water phase gradually changes from greenish yellow to colorlessness, while the color of oil phase gradually changes from colorlessness to greenish yellow along with the reaction time, which visually confirms that the NCs are actually transferred slowly from the water to the oil phase as a function of reaction time.

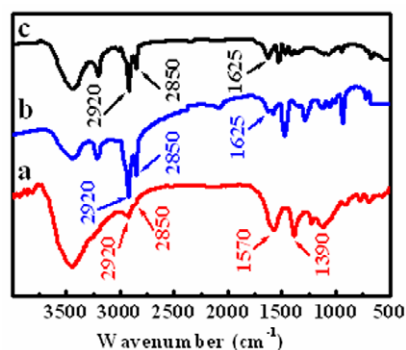

**Fig. S2.** FT-IR spectra of (a) TGA-stabilized CdS NCs, (b) CdS-D-DDAm and (c) D-DDAm. After the phase transfer process, the characteristic absorption peak at 1625  $\text{cm}^{-1}$  ( $\nu_{N-H}$ ) from DDAm are present, while the peaks at 1570  $\text{cm}^{-1}$  and 1390  $\text{cm}^{-1}$  ( $\nu_{\text{COO}^-}$ ) from TGA disappear. Moreover, the peak intensity at 2850 and 2920  $\text{cm}^{-1}$  ( $\nu_{\text{CH}_2}$ ) is stronger than that of parent NCs. It means the achievement of the phase transfer through ligand exchange reaction.

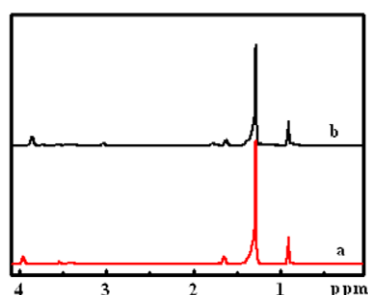

**Fig. S3.**  $^1\text{H}$  NMR of (a) CdS-D-DDAm and (b) D-DDAm. The  $^1\text{H}$  NMR spectrum of CdS-D-DDAm is almost unchanged in compared with that of D-DDAm except the key protons ( $-\text{CH}_2\text{-N}-$ ) at ca. 4 ppm are slightly shifted. This difference indicates the strong interaction of D-DDAm ligand with the CdS NCs surface.

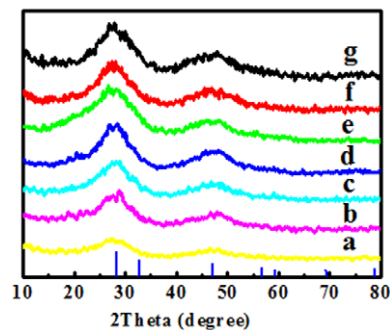

**Fig. S4.** XRD patterns of (a) TGA-stabilized CdS NCs, (b) CdS-D-PAm, (c) CdS-D-OAm, (d) CdS-D-DDAm, (e) CdS-D-CHAm, (f) CdS-D-An and (g) CdS-D-PAAm ( $\tau = 1/1$ , reaction time: 25 d).

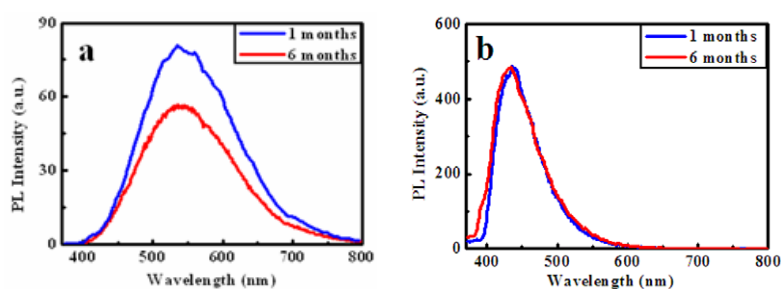

**Fig. S5.** PL spectra of (a) TGA-stabilized CdS NCs and (b) CdS-D-DDAm ( $\lambda_{\text{ex}} = 360$  nm).

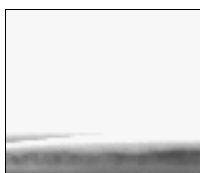

**Fig. S6.** Contact angle of the film of TGA-stabilized CdS NCs.
